# Supplementary material for: Molecular inclusion of organometallic sandwich complexes within hybrid cavitand-resorcin[4]arene receptors
Source: Royal Society of Chemistry journal article supplement (doi:10.1039/b707442e), 2007-01-01
Supplement: b707442e.pdf [file b707442e.pdf]

## *Supporting Information*

### **Molecular Inclusion of Organometallic Sandwich Complexes within Hybrid Cavitand-resorcin[4]arene Receptors**

María Ángeles Sarmentero<sup>a</sup> and Pablo Ballester,<sup>a,b\*</sup>

<sup>a</sup>Institute of Chemical Research of Catalonia (ICIQ), 43007 Tarragona (Spain).

<sup>b</sup>Institució Catalana de Recerca i Estudis Avançats (ICREA), Pg. Lluís Companys  
23, 08010 Barcelona (Spain).

#### **List of Contents**

Figure S1      Structure of substrate and the receptors **2a** and **2b**      S2

#### Fluorescence titrations

Figure S2      Fluorescence titration between **6<sup>+</sup>** and **2a** in MeOH.      S3

Figure S3      Fluorescence titration of **2a@6<sup>+</sup>** by addition of **1a<sup>+</sup>** in MeOH      S4

#### <sup>1</sup>H-NMR studies

Figure S4      <sup>1</sup>H NMR titration of **2a** with **4<sup>+</sup>** in MeOH-*d*<sub>4</sub>      S4

Figure S5      <sup>1</sup>H NMR titration of **2b** with **4<sup>+</sup>** in acetone- *d*<sub>6</sub>      S5

Figure S6      <sup>1</sup>H NMR titration of **2b** with **7<sup>+</sup>** in acetone- *d*<sub>6</sub>      S5

Figure S7      <sup>1</sup>H NMR titration of **2b** with **8<sup>+</sup>** in acetone- *d*<sub>6</sub>      S5

Figure S8      <sup>1</sup>H NMR spectra of **2a** and **2b** with **9a** in MeOH-*d*<sub>4</sub>      S6

Figure S9      <sup>1</sup>H NMR spectra of **2b** and **2b** with **9a** in acetone- *d*<sub>6</sub>      S6

### ITC studies

Figure S10 Calorimetric titration between **1a**<sup>+</sup> and **2b**

S7

### Cyclic voltammetry

Scheme 1 Electrochemical and chemical equilibria for **1a**<sup>+</sup> with non-electroactive **2a** or **2b**

Figure S11 Cyclic voltammetry of **2b** and **2b** in presence of **1a**<sup>+</sup>

S8

### Diffusion coefficients

Figure S12 Calculation of the diffusion coefficients of **1a**<sup>+</sup>

S9

Figure S13 Calculation of the diffusion coefficients of **1a**<sup>+</sup> within cavitand **2a**

S9

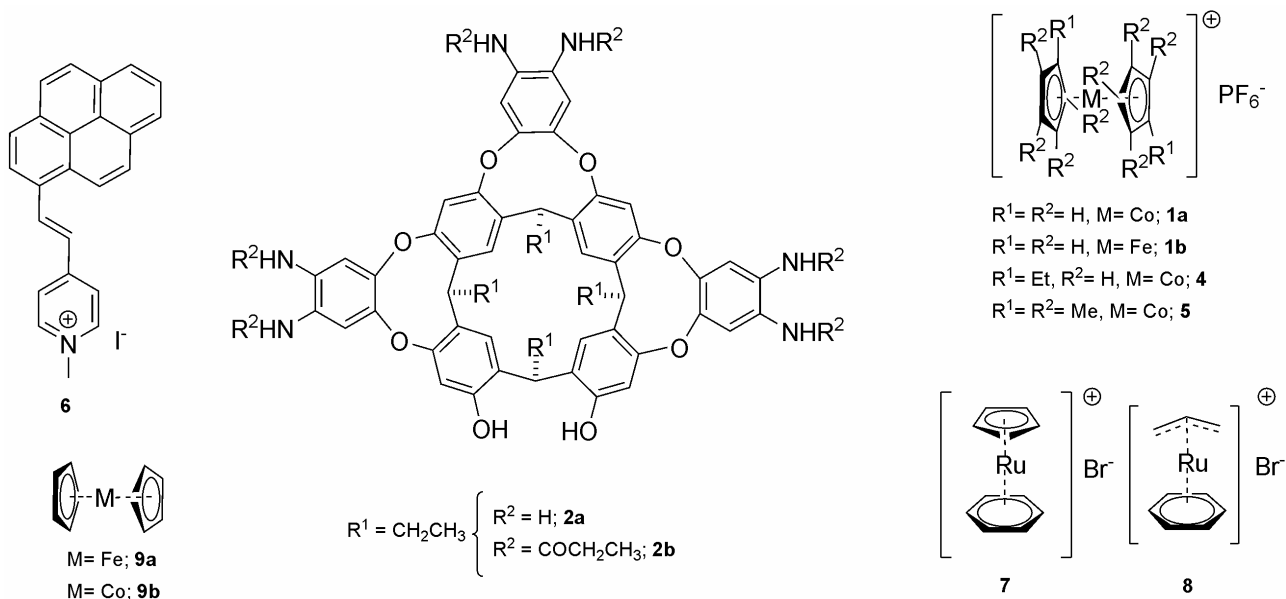

Figure S1. Structure of substrates and the receptors **2a-b**.

## Fluorescence titrations

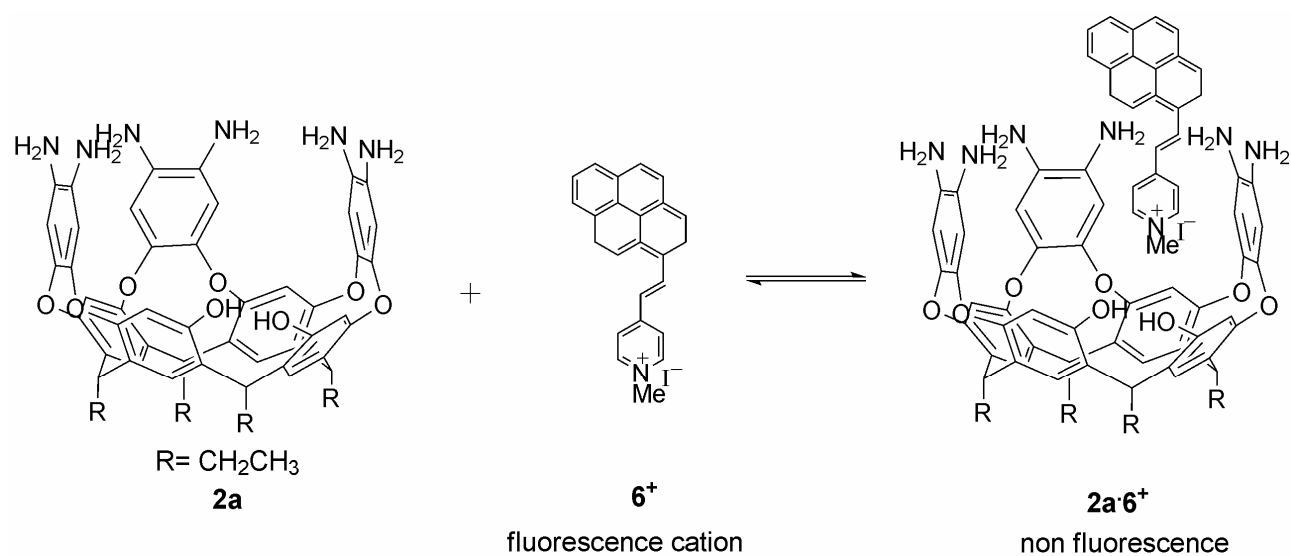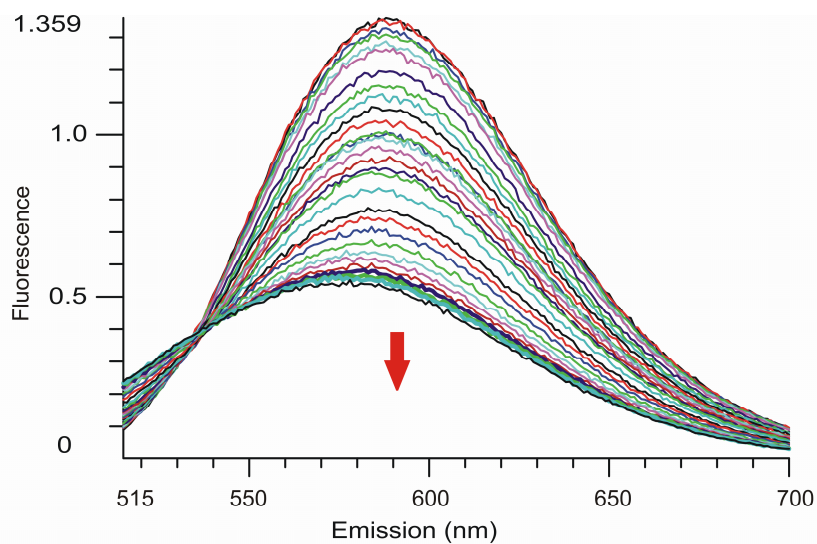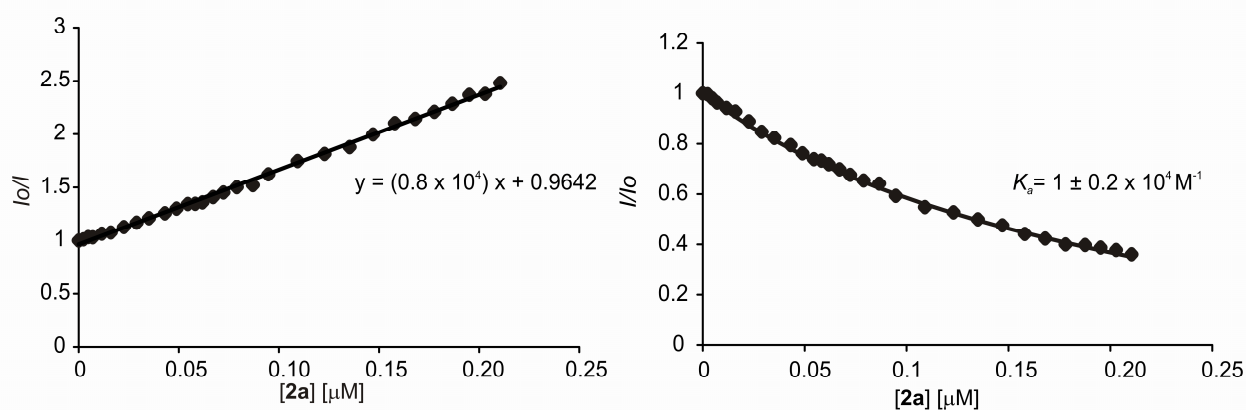

**Figure S2.** : Fluorescence titration of **6<sup>+</sup>** ( $8.25 \times 10^{-6} \text{ M}$ ) in MeOH upon addition of incremental amounts of **2a**.

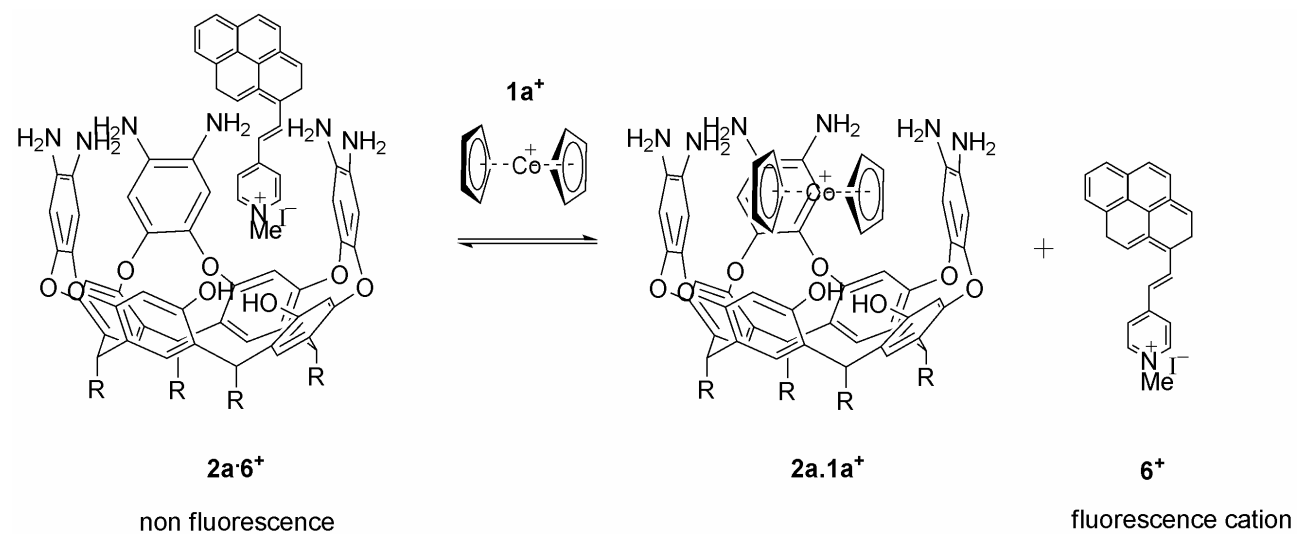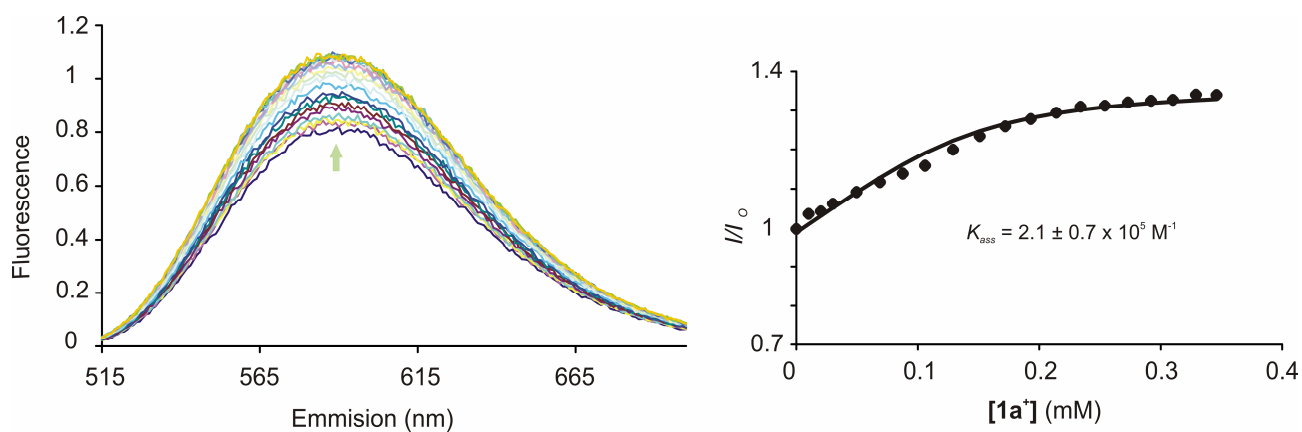

**Figure S3.** : Fluorescence titrations of  $6^+$  (0.24 mM) in MeOH in the presence of  $2a$  (0.15 mM) and upon addition of incremental amounts of  $1a^+$ .

### $^1H$ NMR titrations

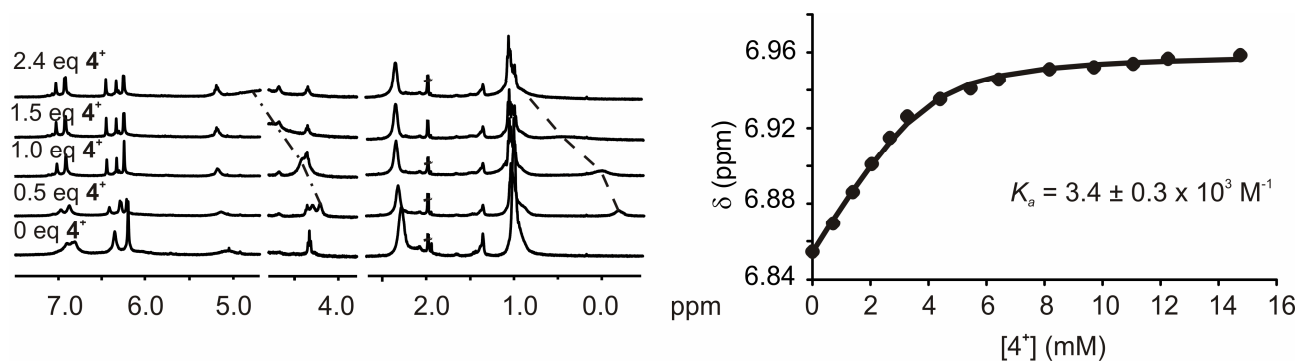

**Figure S4.** : NMR titration of  $2a$  ( $[2a]= 4.48$  mM) with  $4^+$  in MeOH- $d_4$ .

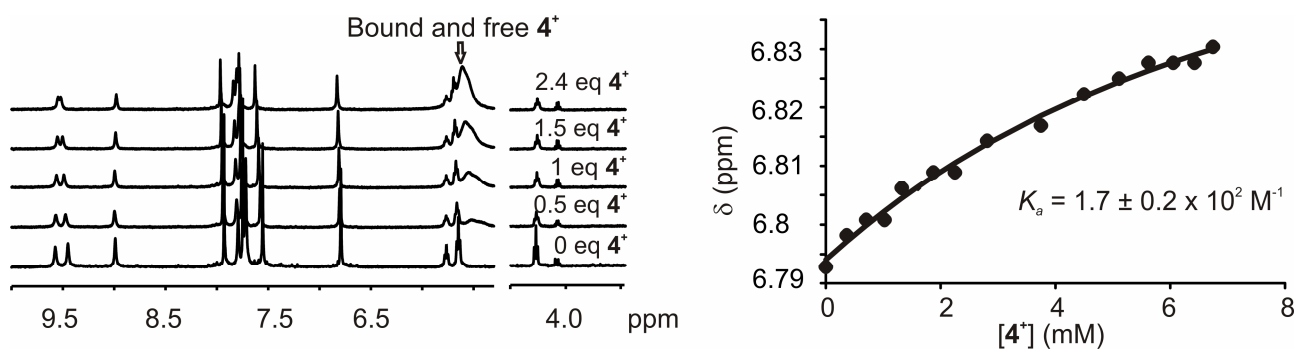

Figure S5. : NMR titration of **2b** ( $[2b]=2.80 \text{ mM}$ ) with  $4^+$  in acetone- $d_6$ .

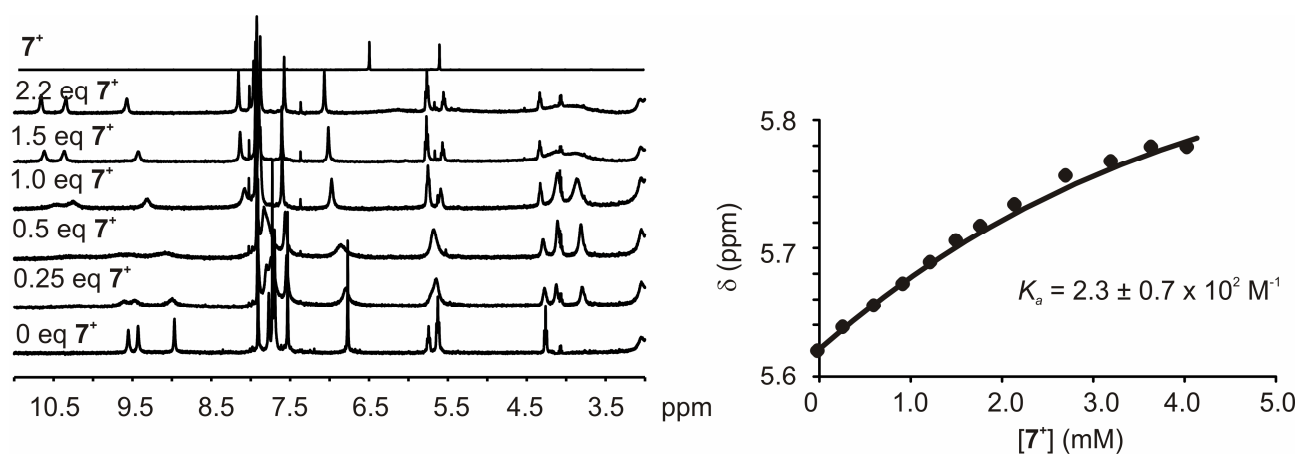

Figure S6. : NMR titration of **2b** ( $[2b]=2.64 \text{ mM}$ ) with  $7^+$  in acetone- $d_6$ .

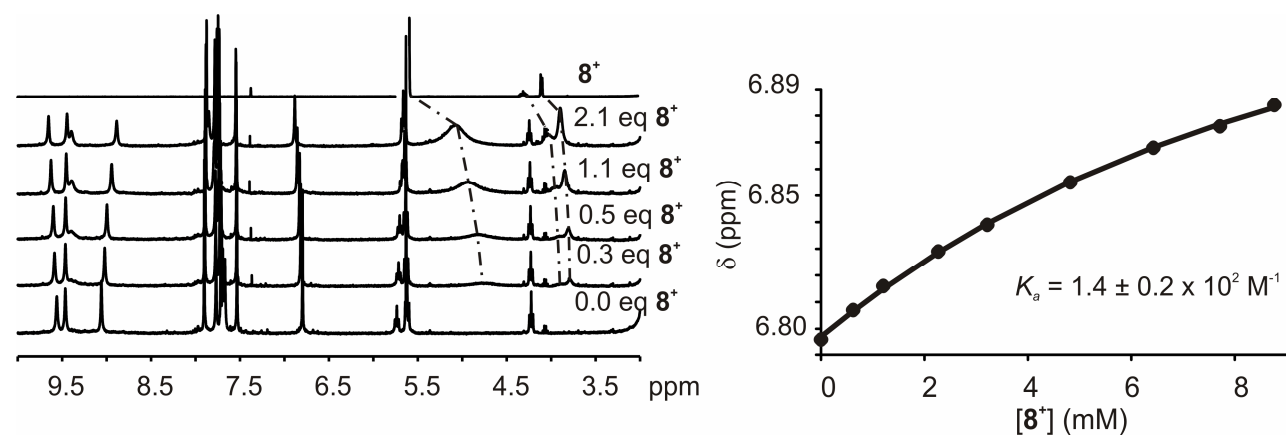

Figure S7. : NMR titration of **2b** ( $[2b]=4.20 \text{ mM}$ ) with  $8^+$  in acetone- $d_6$ .

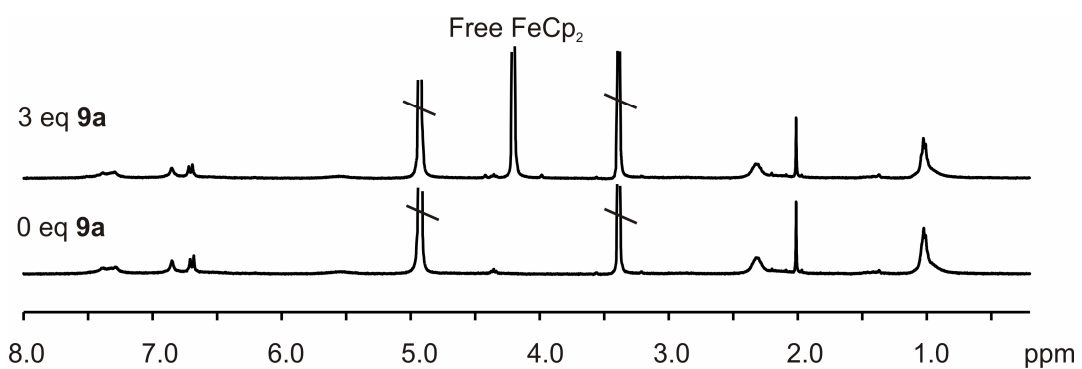

**Figure S8.** : NMR spectra of **2a** ( $[\mathbf{2a}] = 2.50 \text{ mM}$ ) and **2a** with 3 equivalents of **9a** in  $\text{MeOH-}d_4$ .

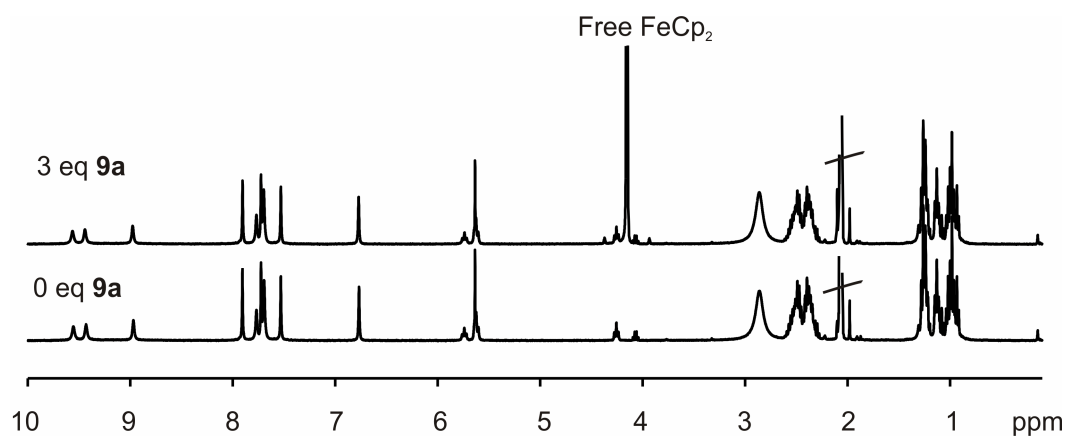

**Figure S9.** : NMR spectra of **2b** ( $[\mathbf{2b}] = 4.50 \text{ mM}$ ) and **2b** with 3 equivalents of **9a** in  $\text{acetone-}d_6$ .

### ITC titration.

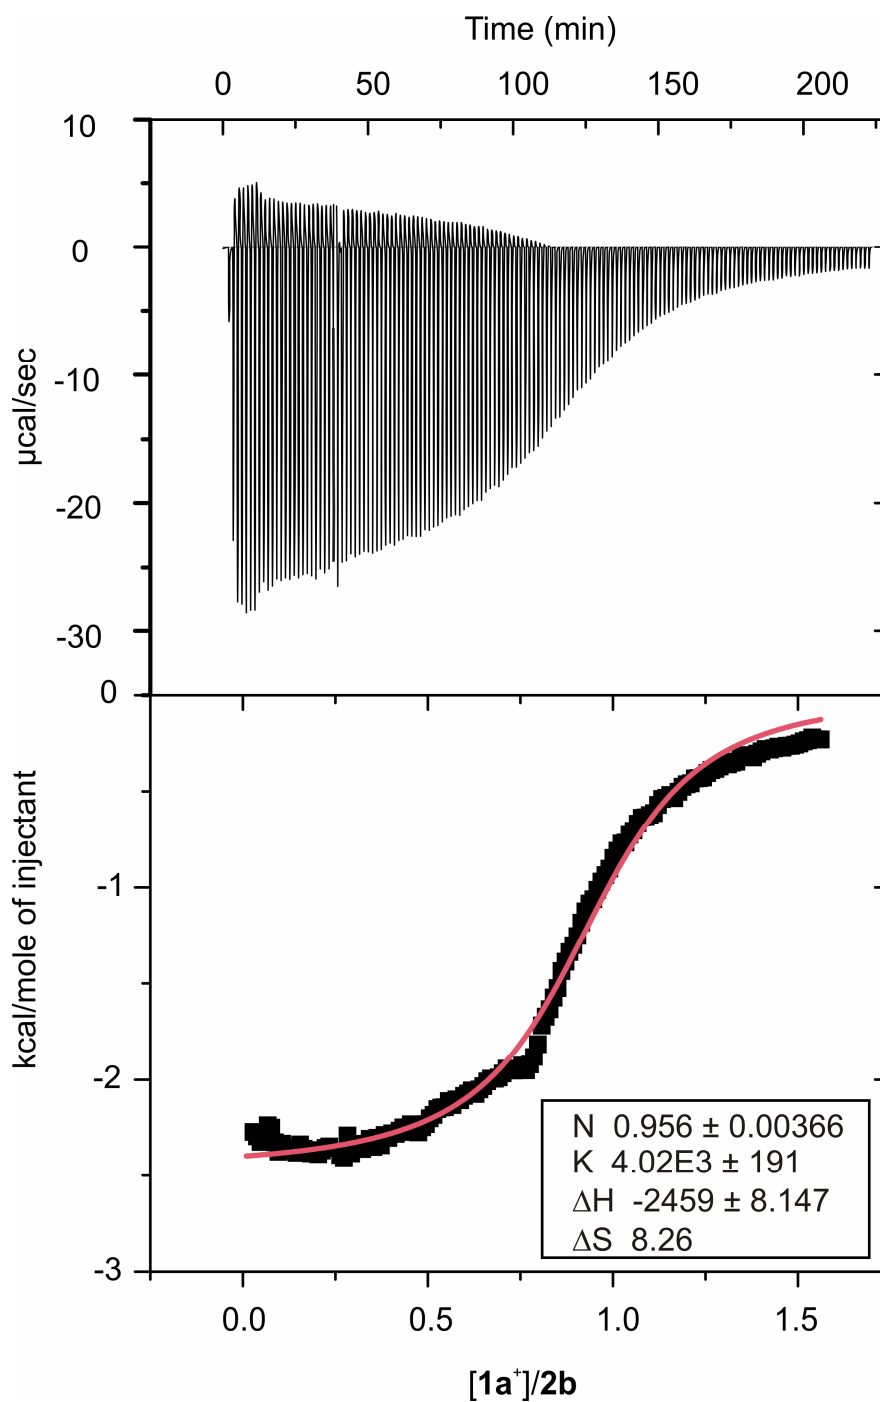

**Figure S10:** Calorimetric titration between the receptor or **2b** ( $[\mathbf{2b}] = 10 \text{ mM}$  in acetone) and  $\mathbf{1a}^+$  seven times more concentrated than the corresponding receptor.

## Cyclic voltammetry

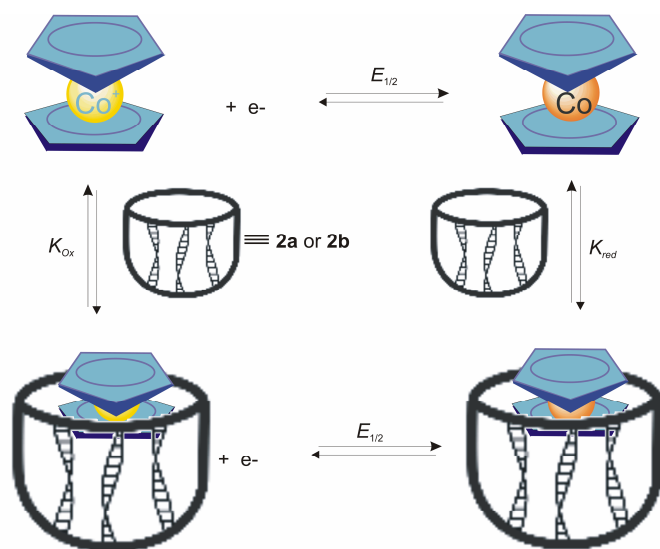

**Scheme S1:** Coupled electrochemical and chemical equilibria for the cobaltocenium  $1a^+$  forming supramolecular complexes with non-electroactive hosts  $2a$  or  $2b$ .

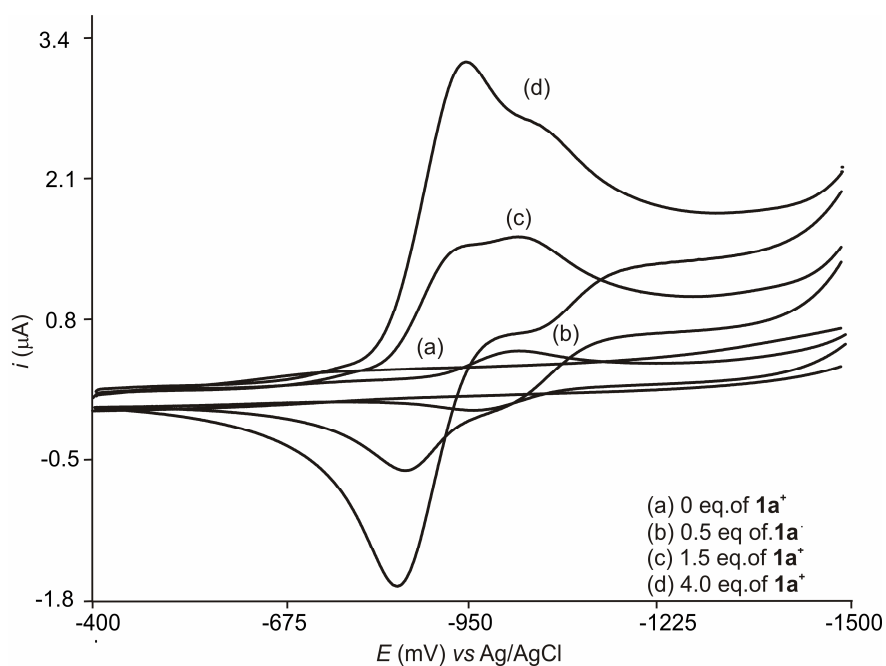

**Figure S11.** : Cyclic voltammetric behavior on glass carbon ( $0.071 \text{ cm}^2$ ) of 1.0 mM  $2b$  in acetone also containing 0.1 M tetraoctylammonium bromide (a) and after each addition ( (b) 0.5 (c) 1.5 (d), 4.0 eq) of cobaltocenium  $1a^+$ . Scan rate 100 mV/s.



## Diffusion coefficients

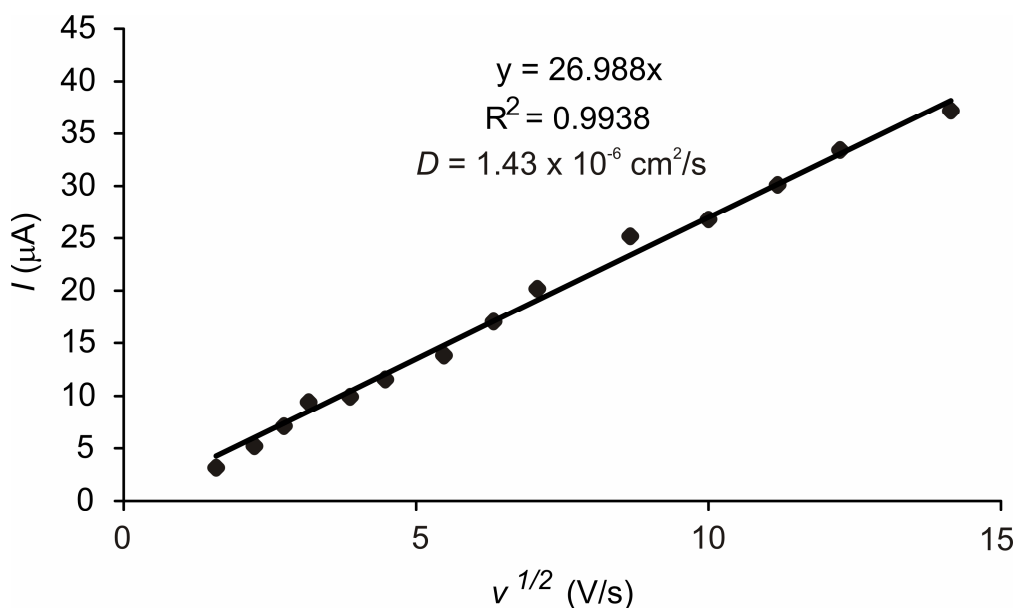

Figure S12: Representation of  $I$  vs  $v^{1/2}$  of a 1.0 mM solution of  $1\text{a}^+$ .

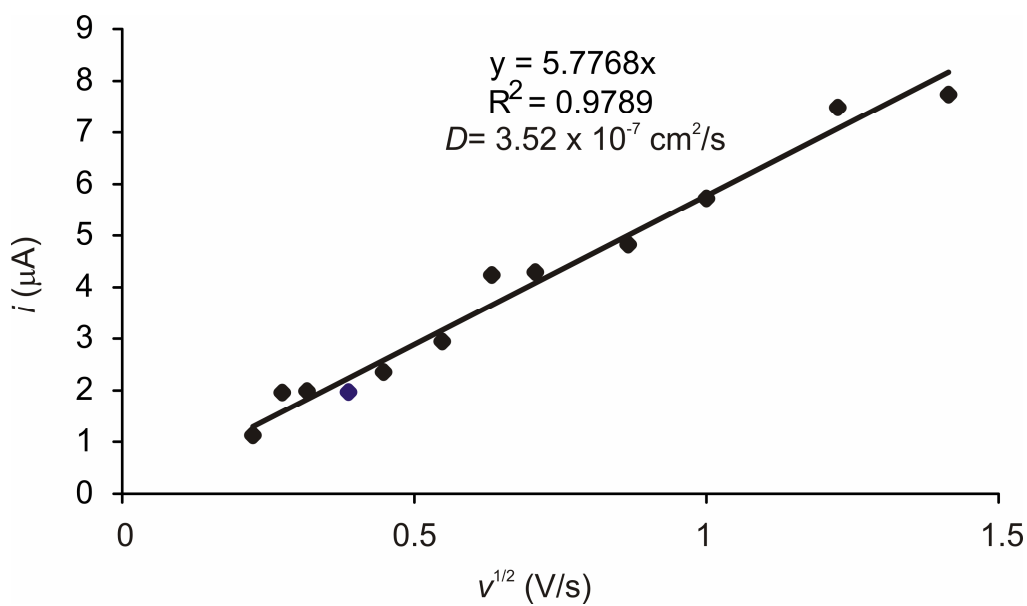

Figure S13: Representation of  $I$  vs  $v^{1/2}$  of a 1.0 mM solution of  $1\text{a}^+$  with 2 equivalents of  $2\text{a}$ .
